# Supplementary material for: Emotion dynamic patterns between intimate relationship partners predict their separation two years later: A machine learning approach
Source: PubMed Central journal article supplement (PMC10325102; doi:10.1371/journal.pone.0288048), 2023-07-06

## Supplementary Material

### A) Positive interactions versus conflict interactions

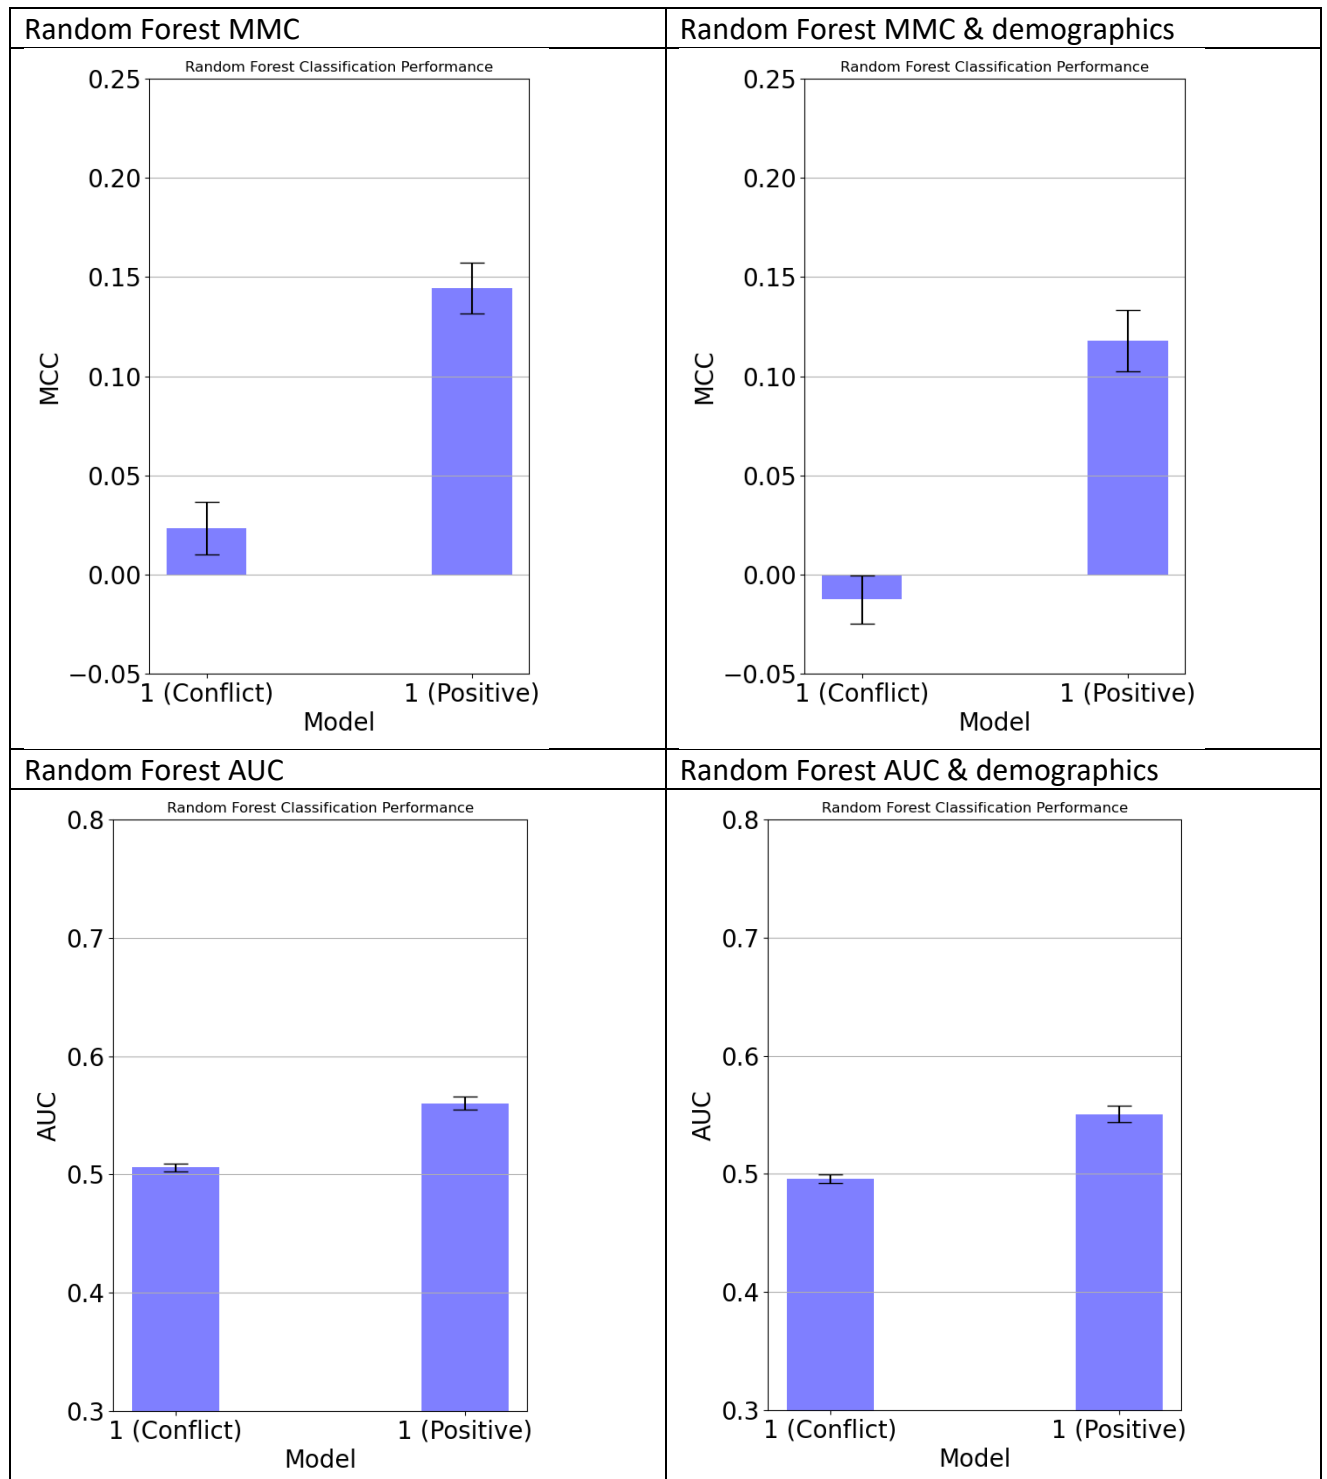

## B) Figures for Positive interactions

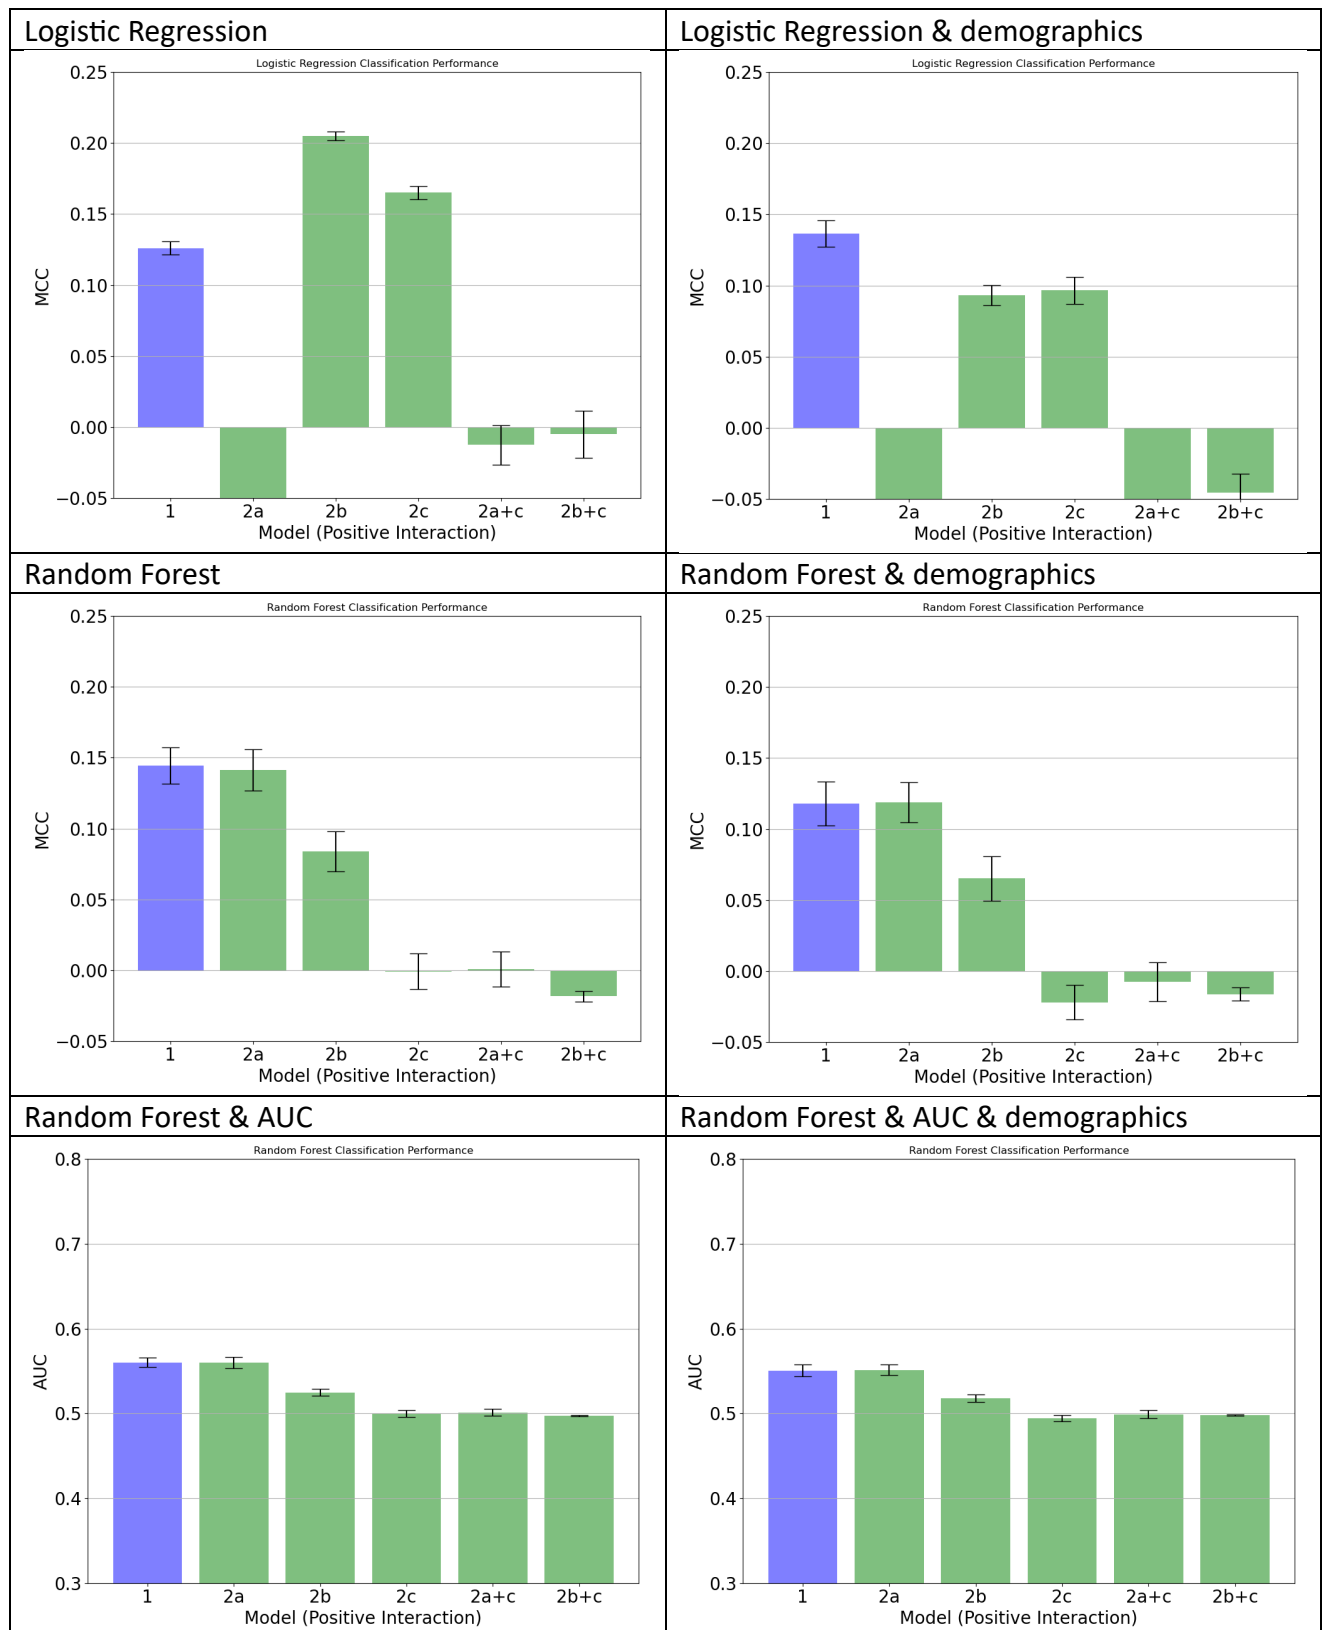

### C) Figures for Conflict interactions

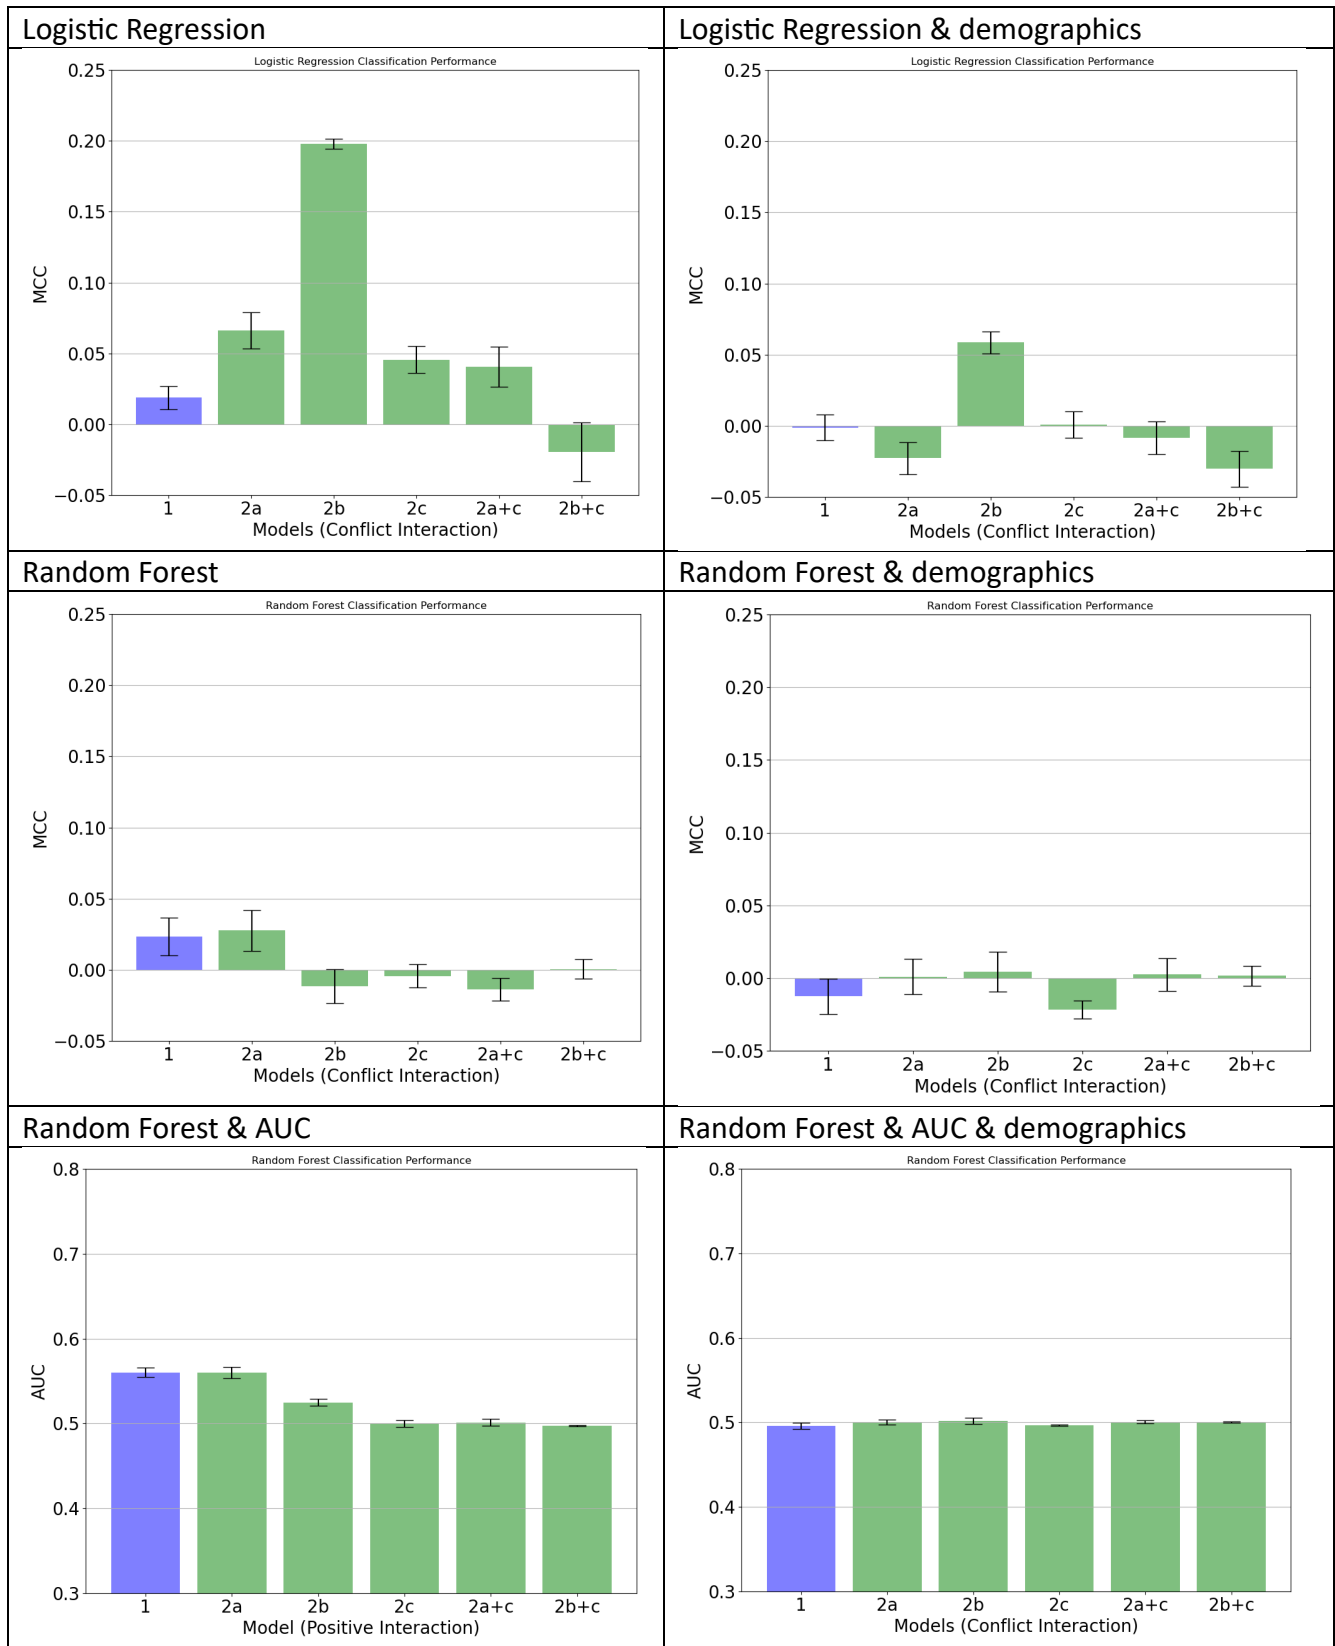

Supplement: pone.0288048.s001.pdf [file pone.0288048.s001.pdf]
